# Supplementary material for: Bioemulsification and Microbial Community Reconstruction in Thermally Processed Crude Oil
Source: Microorganisms. 2021 Sep 29;9(10):2054. doi: 10.3390/microorganisms9102054 (PMC8539444; doi:10.3390/microorganisms9102054)
Supplement: Supplementary file 1 [file microorganisms-09-02054-s001.zip › Figure S1.pdf]

**a ( Thermal pretreatment on crude oil )**

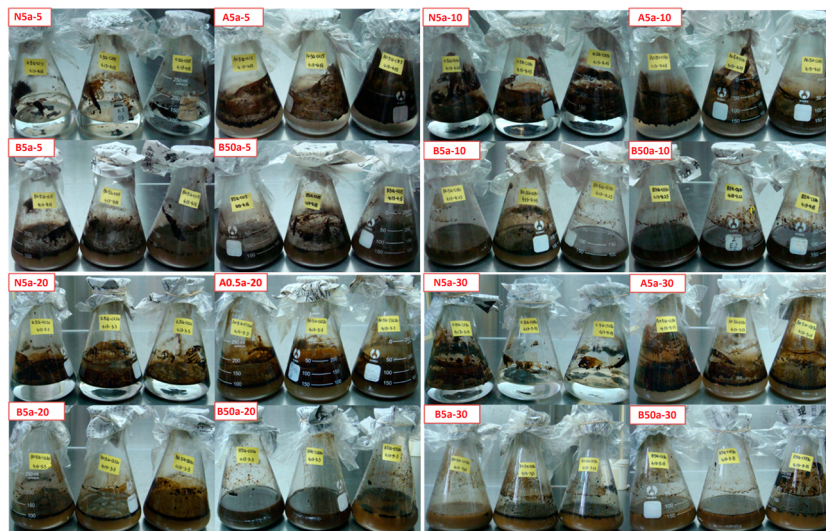

**b ( Two-time thermal pretreatment with a 3-day interval )**

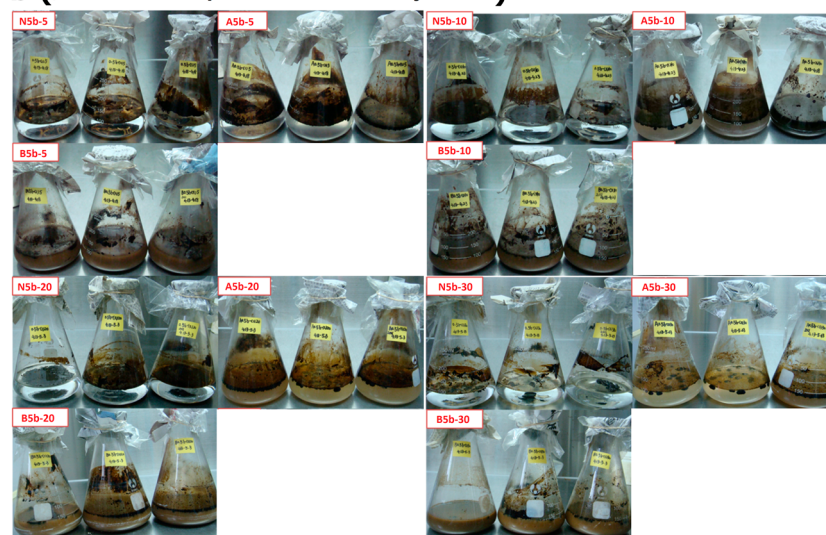

**c ( Raw crude oil )**

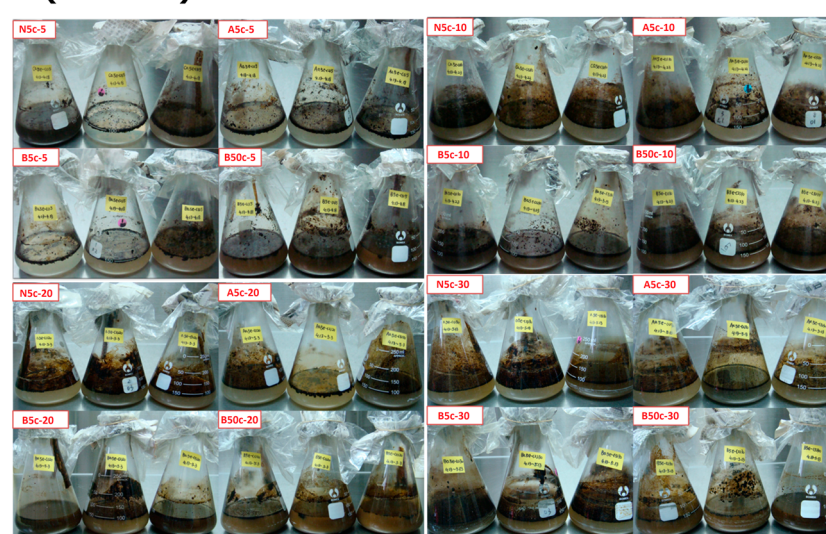

Figure S1: Photographs showing the culture status in each treatment over the 30-day incubation. (a) Thermal pretreatment on crude oil. (b) Two-time thermal pretreatment with a 3-day interval. (c) Raw crude oil.
