# Supplementary material for: Bioemulsification and Microbial Community Reconstruction in Thermally Processed Crude Oil
Source: Microorganisms. 2021 Sep 29;9(10):2054. doi: 10.3390/microorganisms9102054 (PMC8539444; doi:10.3390/microorganisms9102054)
Supplement: Supplementary file 1 [file microorganisms-09-02054-s001.zip › Tables-SI-V2.xlsx]

## Sheet: Table S1
Cell density after once heating (104 CFU/mL)	Genus	N5a-5	N5a-10	N5a-20	N5a-30	A5a-5	A5a-10	A5a-20	A5a-30
	Amycolicicoccus					4.25±3.18
	Dietzia
	Microbacterium						77.50±17.70	(1.27±0.64)×103	55.00±0.01
	Paenibacillus						(1.50±0.01)×102	(3.22±1.98)×102	(1.09±0.06)×102
	Bacillus							(4.73±3.92)×102	95.00±21.20
	Stenotrophomonas							(1.03±0.04)×102	80.00±21.20
	Total					~4.25	~2.28×102	~2.17×103	~3.39×102
	Genus	B5a-5	B5a-10	B5a-20	B5a-30	B50a-5	B50a-10	B50a-20	B50a-30
	Amycolicicoccus
	Dietzia	(1.21±0.39)×104	(1.31±0.44)×104	(2.60±1.09)×103	95.00±21.20	(3.77±0.86)×104	(5.73±0.80)×104	(4.67±0.24)×102	73.33±7.64
	Microbacterium			(1.00±0.01)×103	10.00±0.01				30.00±0.01
	Paenibacillus	1.00±0.01		(2.00±0.91)×102	20.00±0.01
	Bacillus	19.00±5.66	(1.93±0.01)×102	(1.48±0.22)×102	(4.00±1.84)×102	4.50±3.96
	Stenotrophomonas			(1.27±0.01)×102	20.00±0.01
	Total	~1.21×104	~1.33×104	~4.08×103	~5.45×102	~3.77×104	~5.73×104	~4.67×102	~1.03×102
Cell density after twice heating (105 CFU/mL)	Genus	N5b-5	N5b-10	N5b-20	N5b-30	A5b-5	A5b-10	A5b-20	A5b-30
	Amycolicicoccus					6.82±1.86	2.59±1.99
	Dietzia
	Total					~6.82	~2.59
	Genus	B5b-5	B5b-10	B5b-20	B5b-30
	Amycolicicoccus
	Dietzia	(5.26±3.23)×102	(2.02±0.50)×103	(1.79±1.44)×102	24.30±20.61
	Total	~5.26×102	~2.02×103	~1.79×102	~24.3
Cell density in non-heating control (105 CFU/mL)	Genus	N5c-5	N5c-10	N5c-20	N5c-30	A5c-5	A5c-10	A5c-20	A5c-30
	Dietzia
	Pseudomonas	(1.56±0.07)×103	(5.77±1.69)×102	(5.21±1.54)×103	(4.89±0.53)×102	(1.06±0.74)×103	(1.05±0.77)×103	(1.10±0.01)×103	(3.17±2.02)×102
	Microbacterium	51.75±2.47	70.00±42.40	(5.50±0.01)×102	(2.07±2.57)×102	20.00±2.55	(3.00±0.01)×102	(7.00±0.01)×102	(3.50±2.12)×102
	Hyphomonas	(8.92±1.68)×102		(2.75±0.92)×103	(1.13±0.07)×103
	Ochrobactrum	(1.00±0.01)×102	(7.00±0.42)×102		(7.00±4.10)×102	(3.80±1.27)×102	(3.00±0.42)×102	(3.00±1.41)×102	(9.50±0.71)×102
	Achromobacter	(5.52±2.94)×102	(1.26±0.07)×103	(2.17±0.29)×103	(9.14±2.40)×102	(1.53±0.25)×103	(3.63±0.11)×103	(1.10±0.17)×103	(7.67±2.52)×102
	Stenotrophomonas					(2.85±0.50)×102	(1.18±0.23)×103	(3.15±0.78)×103	(1.00±0.20)×103
	Rhizobium	6.00±0.01		(1.00±0.01)×102	60.00±39.60
	Cellulomonas
	Total	~3.17×103	~2.61×103	~1.08×104	~3.50×103	~3.27×103	~6.46×103	~6.35×103	~3.38×103
	Genus	B5c-5	B5c-10	B5c-20	B5c-30	B50c-5	B50c-10	B50c-20	B50c-30
	Dietzia	(3.40±0.57)×102	(1.49±0.25)×103	(3.82±0.21)×103	(1.46±0.47)×103	(8.23±2.40)×102	(1.51±0.52)×103	(1.94±0.59)×102	5.50±0.01
	Pseudomonas	(7.83±2.31)×102	(1.02±0.18)×103	(8.83±2.36)×102	(2.92±0.54)×103	18.80±7.49	(3.97±0.31)×102
	Microbacterium	(2.69±0.54)×102	(1.35±0.31)×103	(1.00±0.01)×103	(1.07±0.62)×103	17.70±10.80	(4.08±0.90)×102	(6.10±1.97)×102	(2.22±0.90)×102
	Hyphomonas
	Ochrobactrum	30.00±0.01	(3.75±0.07)×102	(5.75±3.89)×102	(7.53±3.57)×102	52.30±18.90		(2.55±1.96)×102
	Achromobacter	(5.67±0.76)×102	(5.35±3.02)×102	(2.57±0.12)×103	(3.51±2.19)×102	39.00±7.81	(6.88±2.66)×102	(1.08±0.63)×102	63.50±13.40
	Stenotrophomonas
	Rhizobium
	Cellulomonas					7.75±3.18		59.00±21.60	23.75±5.30
	Total	~1.99×103	~4.77×103	~8.84×103	~3.92×103	~9.58×102	~3.00×103	~1.23×103	~3.14×102
